# Supplementary material for: Enhanced osteogenic proliferation and differentiation of human adipose-derived stem cells on a porous n-HA/PGS-M composite scaffold
Source: PubMed Central journal article supplement (PMC6538636; doi:10.1038/s41598-019-44478-8), 2019-05-28
Supplement: 41598_2019_44478_MOESM1_ESM.pdf [file 41598_2019_44478_MOESM1_ESM.pdf]

**Enhanced osteogenic proliferation and differentiation of human adipose-derived stem cells on a porous n-HA/PGS-M composite scaffold**

Yaozong Wang, Naikun Sun, Yinlong Zhang, Bin Zhao, Zheyi Zhang, Xu Zhou, Yuanyuan Zhou, Hongyi Liu, Ying Zhang, Jianguo Liu

**$\beta$ -actin**

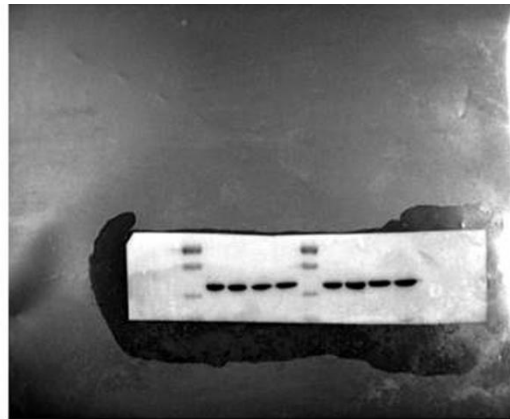

**RUNX2**

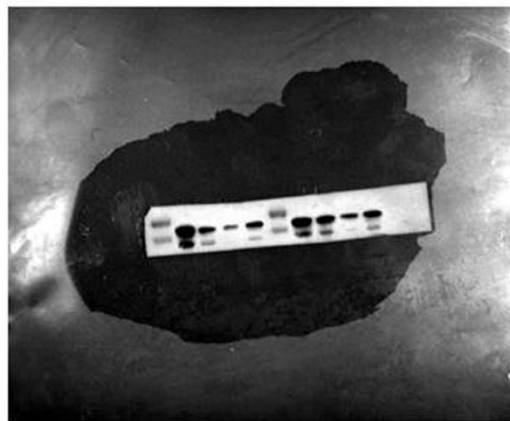

**COL1A1**

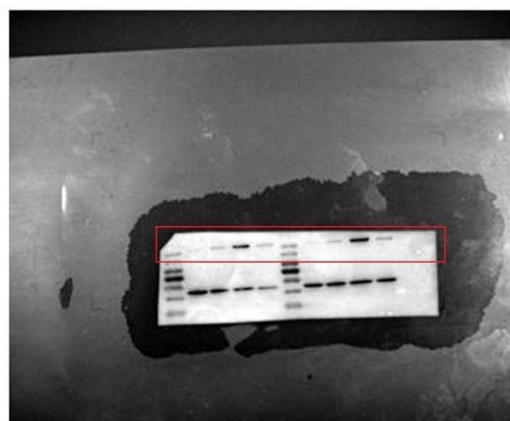

**Supplementary figure 1**

The RUNX2 and COL1A1 levels detected by western blot. The red rectangle in the bottom image represented COL1A1 expressed level.

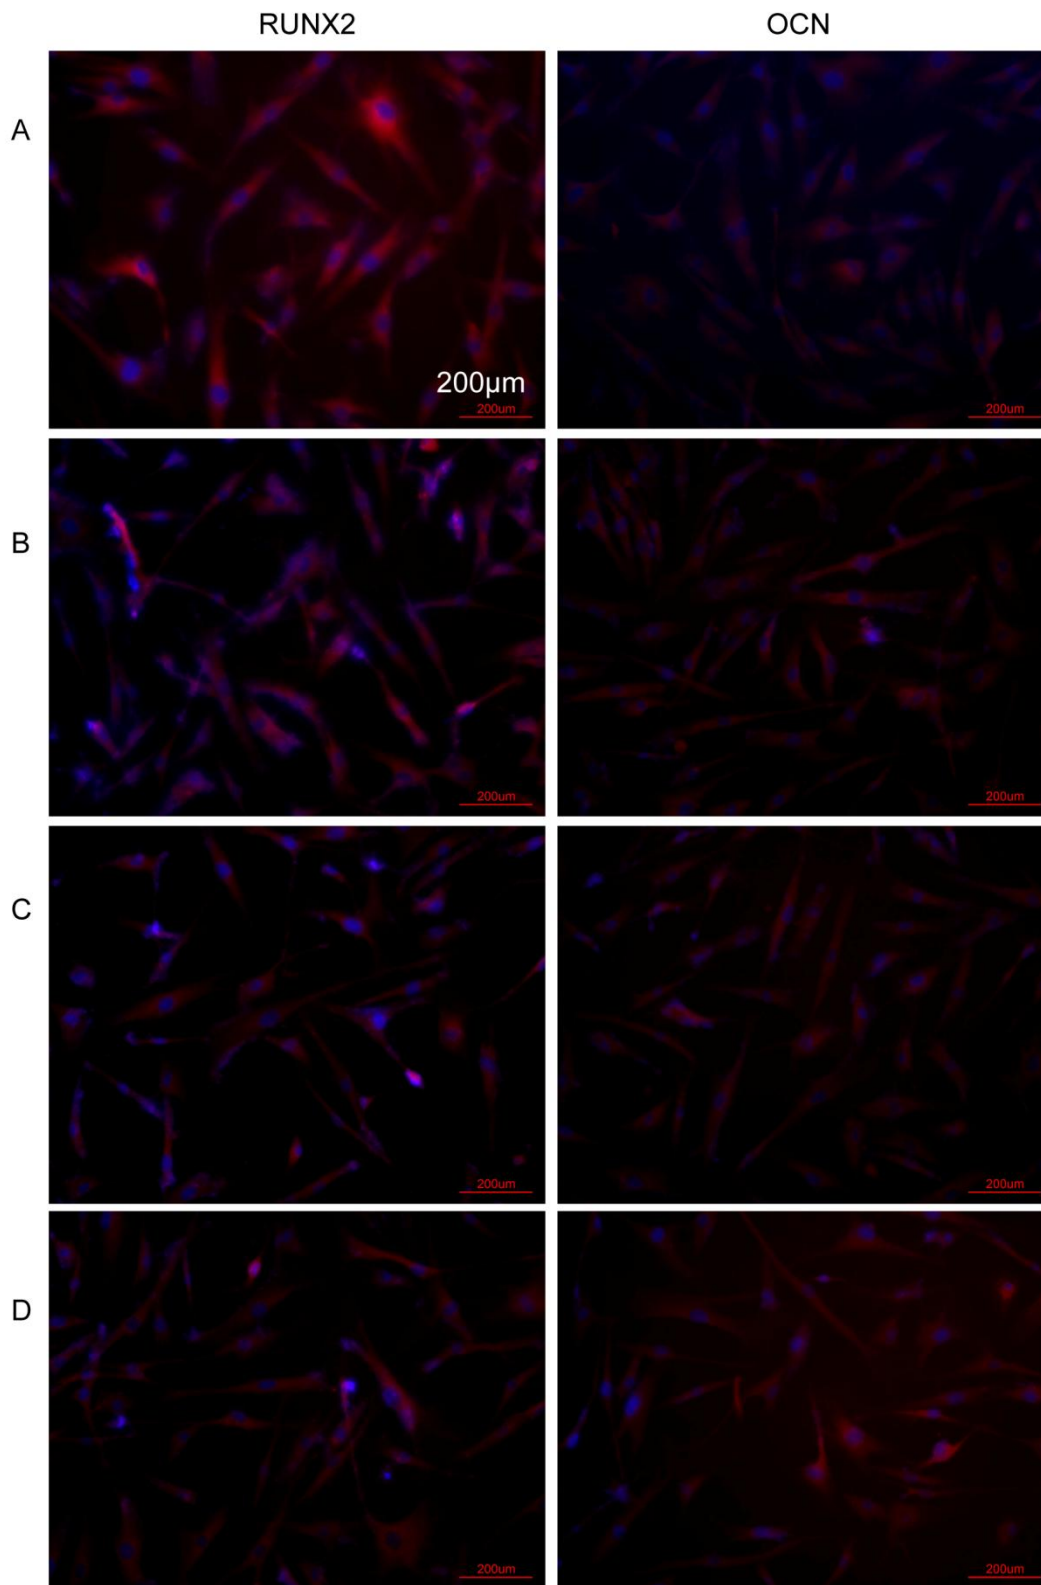

**Supplementary figure 2**

The immunohistochemical results of PGS-g-M scaffolds (A), and PGS-M-n-HA-0.4 (B), PGS-M-n-HA-0.5 (C), and PGS-M-n-HA-0.6 composite scaffolds (D).

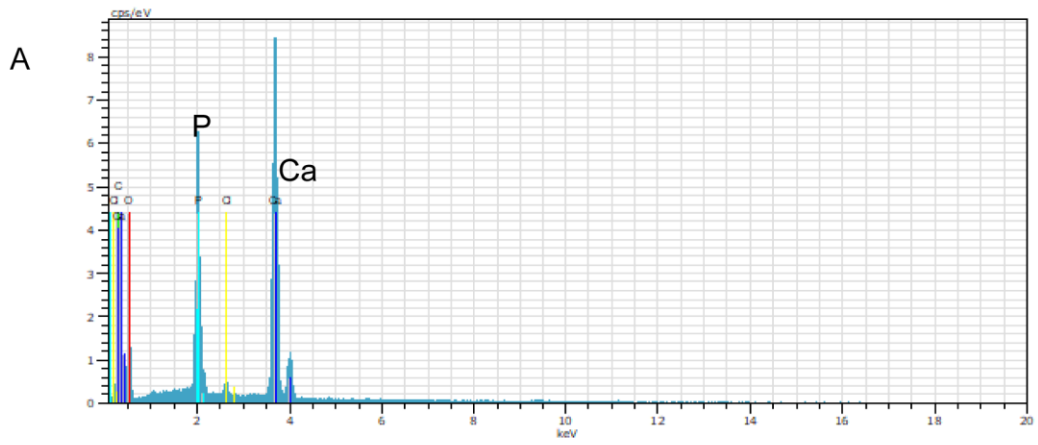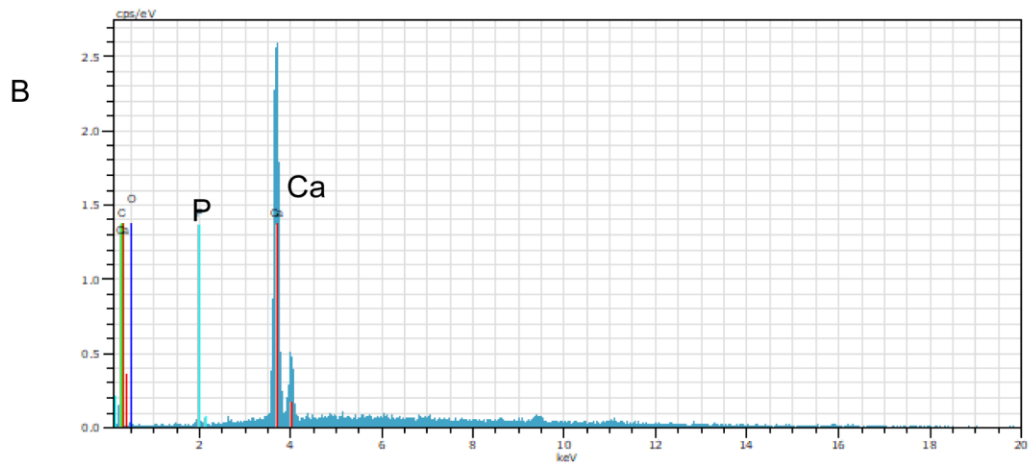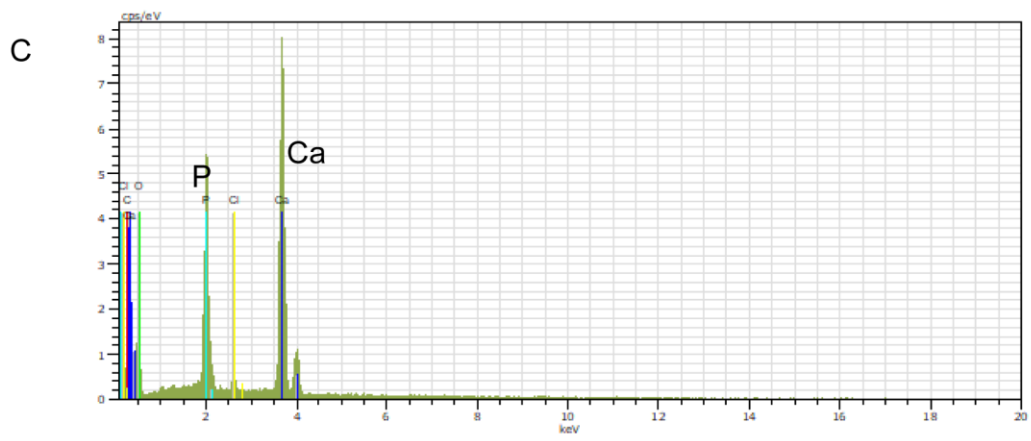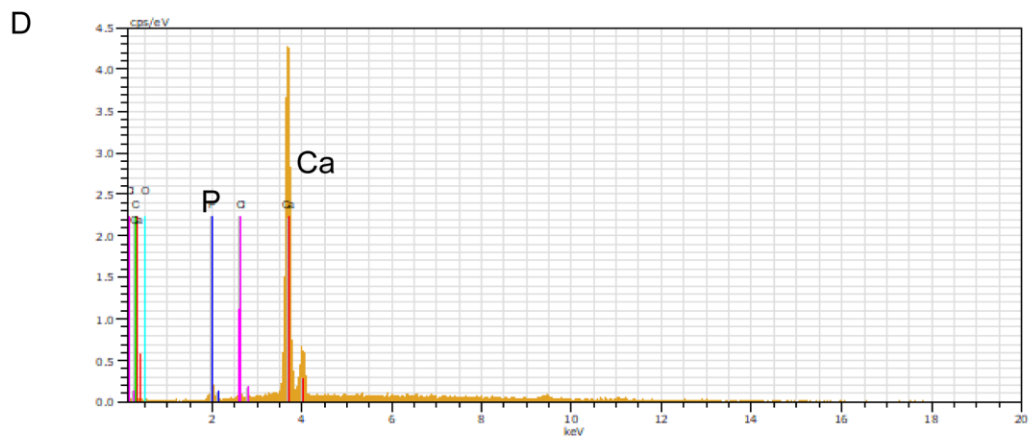

### **Supplementary figure 3**

The Ca-P chemical element analysis on the surface of the four scaffolds by energy-dispersive X-ray spectroscopy (EDS) at 4 weeks. PGS-g-M scaffolds (A), and PGS-M-n-HA-0.4 (B), PGS-M-n-HA-0.5 (C), and PGS-M-n-HA-0.6 composite scaffolds (D).
